# Supplementary material for: A Coarse-Grained Biophysical Model of E. coli and Its Application to Perturbation of the rRNA Operon Copy Number
Source: PubMed Central journal article supplement (PMC2320978; doi:10.1371/journal.pcbi.1000038), 2008-05-02
Supplement: pcbi.1000038.s005.pdf [file pcbi.1000038.s005.pdf]

**Table S4. Transcription related parameters for 2 doub/h, 37°C.** Transcription related parameters as defined in [28], obtained here for 2 doub/h. Values in bold were estimated. See S1.2 in Text S1 for further explanations.

| Genetic parameter                            | Units                   | P1 <sup>a</sup>   | P2 <sup>a</sup>   | constitutive <sup>a</sup> | repressable <sup>a</sup>  | pause <sup>a</sup>       |
|----------------------------------------------|-------------------------|-------------------|-------------------|---------------------------|---------------------------|--------------------------|
| $D_i = V_{cell}(2 \text{ doub/h}) \cdot d_i$ | average copies per cell | 27 <sup>b</sup>   | 27 <sup>b</sup>   | 40.4 <sup>c</sup>         | <b>408.4</b> <sup>d</sup> | 161.8 <sup>e</sup>       |
| $V_i^{\max}$                                 | ini/min                 | 110 <sup>f</sup>  | 110 <sup>f</sup>  | 33 <sup>g</sup>           | 1.5 <sup>h</sup>          | 3.3 <sup>i</sup>         |
| $c_i$                                        | nuc/sec                 | 85 <sup>j</sup>   | 85 <sup>j</sup>   | 52 <sup>j</sup>           | 52 <sup>j</sup>           | <b>0.89</b> <sup>d</sup> |
| $K_{m,i}$                                    | molec/cell              | 1240 <sup>l</sup> | 2531 <sup>k</sup> | 405 <sup>k</sup>          | 405 <sup>k</sup>          | 405 <sup>k</sup>         |
| $L_i$                                        | base pairs              | 6000 <sup>m</sup> | 6000 <sup>m</sup> | 2000 <sup>m</sup>         | 1000 <sup>m</sup>         | 1000 <sup>m</sup>        |

<sup>a</sup> Promoter classes as defined by [28].

<sup>b</sup> The average number of copies of the *rrn* operon per cell,  $D_{rrn}(\mu)$ , is given by Eq. S7:  $D_{rrn}(\mu) = \sum_{j=1}^7 2^{\mu(C(1-m_j^{(rrn)})+D)}$ , where  $m_j^{(rrn)}$  are the *rrn* operon map locations given in Table S1.

<sup>c</sup> According to [28],  $[P_{constitutive}] = 1.5[P_{rn}]$ , in order to fit to (1) transcription of all r-proteins and (2) mRNA synthesis rate. This is consistent with the length of the r-protein gene class given in Table S1: the total DNA per chromosome associated with this gene class is roughly  $40.4/(27/7 = \text{gene dosage per gene}) \cdot (2000 \text{ bp}) = 20,948 = \text{total length of constitutive class coding genes}$ , compared with  $L_{r-protein} = 21252$  (Table S1).

<sup>d</sup> Estimated value - see S1.2.

<sup>e</sup> According to [28], based on known fractions of intermittently inactive RNAP in the cell  $[P_{pause}] = 6[P_{rn}]$ .

<sup>f</sup> Estimated in [3]. Assumed to be growth rate independent [28].

<sup>g</sup> As measured for the *spc* ribosomal promoter, which is a representative promoter for this class (see [28]).

<sup>h</sup> As measured for  $\beta$ -lactamase promoter, which is taken to be a representative promoter for this class (see [28]).

<sup>i</sup> Maximum initiation rate was set to be ten fold lower than the  $V^{\max}$  for the constitutive gene class, assuming pause genes are blocked 90% of the time [28].

<sup>j</sup> See table 3 in [17].

<sup>k</sup> Constitutive promoter binding affinities scale according to cell volume with respect to their values at 2.5 doub/h and are taken from [28]. Volumes are given in Table S2.

<sup>l</sup> Taken from table 5 of [105]:  $K_{P1}:K_{P2}$  at (2.14 doub/h) = 0.49:1, i.e.  $1240 = 0.49 \cdot 2531$ .

<sup>m</sup> See tables 1 and 2 in [28].
