# Supplementary material for: A Coarse-Grained Biophysical Model of E. coli and Its Application to Perturbation of the rRNA Operon Copy Number
Source: PubMed Central journal article supplement (PMC2320978; doi:10.1371/journal.pcbi.1000038), 2008-05-02
Supplement: pcbi.1000038.s006.pdf [file pcbi.1000038.s006.pdf]

**Table S5. Genetic parameters for *E. coli* growing at 2 doub/h, 37°C.** See also footnotes in Table S1 and S1.2 in Text S1 for further explanations.

| Gene class        |                                           | Units      | r-protein          | bulk                            | <i>rrn</i>        |
|-------------------|-------------------------------------------|------------|--------------------|---------------------------------|-------------------|
| $m^h$             | Map location                              | MU (min)   | see footnote       | 191 uniformly distributed genes | see footnote      |
| $V_i^{\max}$      | Maximum transcription initiation rate     | ini/min    | 33 <sup>a</sup>    | 2.01 <sup>d</sup>               | 110 <sup>a</sup>  |
| $U_i^{\max}$      | Maximum translation initiation rate       | ini/min    | -                  | 80 <sup>a</sup>                 | -                 |
| $K_{m,i}$         | Promoter-RNAP holoenzyme binding affinity | molec/cell | 405 <sup>c</sup>   | 405 <sup>c</sup>                | 708 <sup>i</sup>  |
| $L_{m,i}$         | RBS-30S ribosome subunit binding affinity | molec/cell | -                  | 13261 <sup>g</sup>              | -                 |
| $T_{1/2,i}^{fun}$ | mRNA half-life                            | min        | -                  | 6.8 <sup>c</sup>                | -                 |
| $L_i$             | Gene class length                         | base pairs | 21252 <sup>a</sup> | 1000 <sup>a</sup>               | 6623 <sup>a</sup> |
| $c_p$             | Peptide chain elongation rate             | aa/sec     | 20 <sup>b</sup>    | 20 <sup>b</sup>                 | -                 |
| $c_i$             | RNA chain elongation rate                 | nuc/sec    | 52 <sup>b</sup>    | 1.87 <sup>f</sup>               | 85 <sup>b</sup>   |

<sup>a</sup> See footnote e Table S1. r-protein and *rrn* maximum transcription initiation rates are given in Table S4.

<sup>b</sup> See table 3 in [17]. By redefining  $c_p$  to include 30S subunits bound to the RBS we obtain 20→19.1 aa/sec. Also see footnote k in Table S1.

<sup>c</sup>  $K_m(2 \text{ doub/h; molec/cell}) = K_m(2.5 \text{ doub/h; molec/cell})V_{cell}(2 \text{ doub/h})/V_{cell}(2.5 \text{ doub/h})$ , where values for  $K_m$  and  $V_{cell}$  are taken from Tables S1 and S2 respectively.

<sup>d</sup>  $V^{\max}$  for the bulk promoter is calculated according to data from Table S4- see footnote e in Table S1 for formula.

<sup>e</sup> Based on total mRNA half-life measurement for LB broth at 37°C [40] (see Table S1 footnote i).

<sup>f</sup> Bulk mRNA chain elongation rate,  $c_{bulk}$ , was calculated according to data from Table S4- see footnote l in Table S1 for formula. By redefining  $c_r$  and  $c_{ps}$  to include RNAP bound to the promoter we obtain  $c_{bulk}=1.78 \text{ nuc/sec}$ . See footnote l, Table S1.

<sup>g</sup> 30S ribosome subunit binding affinity was estimated by finding the  $c_{ribo}$  and  $L_{m,bulk}$  that minimize the mean square error between the predicted and observed WT cell state at 2 doub/h (Table S2), given  $n_0 = 2.80 \cdot 10^6 \text{ molec/WT cell}$  (see S1.1.1 for example at 2.5 doub/h). The estimated cost was  $c_{ribo} \approx 38 \text{ bulk protein per ribosome}$ .  $n_0$  was chosen so that the predicted cost is the cost that gives the best fit for the data of Asai et al.. See main text for further explanations regarding  $c_{ribo}$ .

<sup>h</sup> r-protein and *rrn* map locations are given in Table S1. The number of bulk genes was calculated as explained in footnote d of Table S1 (with  $D_r$  and  $D_{ps}$  for the calculation of  $D_{bulk}$  given in Table S4). Gene concentrations are calculated according to the formulae given in Table S1 footnote d with  $\mu_0=2.0 \text{ doub/h}$ ,  $D_{rrn}(2 \text{ doub/h}) = 27 \text{ copies per cell}$  (Table S4),  $D_{r-protein}(2 \text{ doub/h}) = 27/7 \text{ copies per cell}$  (c.f. Table S4) and  $D_{bulk}(2 \text{ doub/h}) \cong 571 \text{ copies per cell}$ .

<sup>i</sup> The binding affinity for the *rrn* gene class,  $K_{m,rrn}$ , was calculated as explained in Table S1 footnote g, where free RNAP concentration,  $n_{RNAP,free}$ , is given in Table S2 and  $i_{rrn}$ , the number of initiations per *rrn* operon for 2 doub/h, is given in table 3 of [28].
