# Supplementary material for: A Coarse-Grained Biophysical Model of E. coli and Its Application to Perturbation of the rRNA Operon Copy Number
Source: PubMed Central journal article supplement (PMC2320978; doi:10.1371/journal.pcbi.1000038), 2008-05-02
Supplement: pcbi.1000038.s008.pdf [file pcbi.1000038.s008.pdf]

**Table S7. Genetic parameters for the *rrn* inactivation strains at 2 doub/h, 37°C.** Strain names are indicated in bold. A  $\Delta n$  strain indicates that  $n$  *rrn* operons were inactivated. The table for the  $\Delta 0$  (i.e. wild-type) strain is simply Table S5. Changes with respect to the previous strain are denoted in gray. See S1.3 in Text S1 for further details.

| Gene class               |                                           | Units      | r-protein    | bulk  | <i>rrn</i>                                                   |
|--------------------------|-------------------------------------------|------------|--------------|-------|--------------------------------------------------------------|
| <i>m</i>                 | Map location                              | MU (min)   | see Table S5 |       | C(84.5), D(72.1), G(56.1), H(5.1), B(89.8), E(90.5), A(86.5) |
| $V_i^{\max}$             | Maximum transcription initiation rate     | ini/min    | 33           | 2.01  | 110                                                          |
| $U_i^{\max}$             | Maximum translation initiation rate       | ini/min    | -            | 80    | -                                                            |
| $K_{m,i}$                | Promoter-RNAP holoenzyme binding affinity | molec/cell | 405          | 405   | 708                                                          |
| $L_{m,i}$                | RBS-30S ribosome subunit binding affinity | molec/cell | -            | 13261 | -                                                            |
| $T_{1/2,i}^{\text{fun}}$ | mRNA half-life                            | min        | -            | 6.8   | -                                                            |
| $L_i$ transcr.           | Gene class length transcribed             | base pairs | 21252        | 1000  | 6623                                                         |
| $L_i$ transl.            | Gene class length translated              | base pairs | 21252        | 1000  | 0                                                            |
| $c_p$                    | Peptide chain elongation rate             | aa/sec     | 20           | 20    | -                                                            |
| $c_i$                    | RNA chain elongation rate                 | nuc/sec    | 52           | 1.87  | 85                                                           |

$\Delta 0 = \Delta \text{TX11}$

| Gene class               |                                                                | <i>rrn</i>                                          | Load 1  |
|--------------------------|----------------------------------------------------------------|-----------------------------------------------------|---------|
| <i>m</i>                 | <b><math>\Delta 1 = \Delta \text{Ac} = \text{TA566}</math></b> | C(84.5), D(72.1), G(56.1), H(5.1), B(89.8), E(90.5) | A(86.5) |
| $V_i^{\max}$             |                                                                | 110                                                 | 110     |
| $U_i^{\max}$             |                                                                | -                                                   | 80      |
| $K_{m,i}$                |                                                                | 708                                                 | 708     |
| $L_{m,i}$                |                                                                | -                                                   | 13261   |
| $T_{1/2,i}^{\text{fun}}$ |                                                                | -                                                   | 1.75    |
| $L_i$ transcr.           |                                                                | 6623                                                | 2147    |
| $L_i$ transl.            |                                                                | 0                                                   | 657     |
| $c_p$                    |                                                                | -                                                   | 20      |
| $c_i$                    |                                                                | 85                                                  | 85      |

| Gene class        | <b><math>\Delta 2 = \Delta EAc = TA567</math></b> | <i>rrn</i>                                       | Load 1  | Load 2  |  |
|-------------------|---------------------------------------------------|--------------------------------------------------|---------|---------|--|
| <i>m</i>          |                                                   | C(84.5), D(72.1),<br>G(56.1), H(5.1),<br>B(89.8) | A(86.5) | E(90.5) |  |
| $V_i^{\max}$      |                                                   | 110                                              | 110     | 110     |  |
| $U_i^{\max}$      |                                                   | -                                                | 80      | -       |  |
| $K_{m,i}$         |                                                   | 708                                              | 708     | 708     |  |
| $L_{m,i}$         |                                                   | -                                                | 13261   | -       |  |
| $T_{1/2,i}^{fun}$ |                                                   | -                                                | 1.75    | -       |  |
| $L_i$ transcr.    |                                                   | 6623                                             | 2147    | 0       |  |
| $L_i$ transl.     |                                                   | 0                                                | 657     | 0       |  |
| $c_p$             |                                                   | -                                                | 20      | -       |  |
| $c_i$             |                                                   | 85                                               | 85      | 85      |  |

| Gene class        | <b><math>\Delta 3 = \Delta EBAc = TA568</math></b> | <i>rrn</i>                           | Load 1  | Load 2  | Load 3  |
|-------------------|----------------------------------------------------|--------------------------------------|---------|---------|---------|
| <i>m</i>          |                                                    | C(84.5), D(72.1),<br>G(56.1), H(5.1) | A(86.5) | E(90.5) | B(89.8) |
| $V_i^{\max}$      |                                                    | 110                                  | 110     | 110     | 110     |
| $U_i^{\max}$      |                                                    | -                                    | 80      | -       | -       |
| $K_{m,i}$         |                                                    | 708                                  | 708     | 708     | 708     |
| $L_{m,i}$         |                                                    | -                                    | 13261   | -       | -       |
| $T_{1/2,i}^{fun}$ |                                                    | -                                    | 1.75    | -       | -       |
| $L_i$ transcr.    |                                                    | 6623                                 | 2147    | 0       | 2406    |
| $L_i$ transl.     |                                                    | 0                                    | 657     | 0       | 0       |
| $c_p$             |                                                    | -                                    | 20      | -       | -       |
| $c_i$             |                                                    | 85                                   | 85      | 85      | 85      |

| Gene class        | <b><math>\Delta 4 = \Delta EBHAc = TA430</math></b> | <i>rrn</i>                   | Load 1  | Load 2  | Load 3  | Load 4 |
|-------------------|-----------------------------------------------------|------------------------------|---------|---------|---------|--------|
| <i>m</i>          |                                                     | C(84.5), D(72.1),<br>G(56.1) | A(86.5) | E(90.5) | B(89.8) | H(5.1) |
| $V_i^{\max}$      |                                                     | 110                          | 110     | 110     | 110     | 110    |
| $U_i^{\max}$      |                                                     | -                            | 80      | -       | -       | -      |
| $K_{m,i}$         |                                                     | 708                          | 708     | 708     | 708     | 708    |
| $L_{m,i}$         |                                                     | -                            | 13261   | -       | -       | -      |
| $T_{1/2,i}^{fun}$ |                                                     | -                            | 1.75    | -       | -       | -      |
| $L_i$ transcr.    |                                                     | 6623                         | 2147    | 0       | 2406    | 1538   |
| $L_i$ transl.     |                                                     | 0                            | 657     | 0       | 0       | 0      |
| $c_p$             |                                                     | -                            | 20      | -       | -       | -      |
| $c_i$             |                                                     | 85                           | 85      | 85      | 85      | 85     |

| Gene class        | <b><math>\Delta 5 = \Delta EBHGzAc = TA476</math></b> | <i>rrn</i>       | Load 1  | Load 2  | Load 3  | Load 4 | Load 5  |  |
|-------------------|-------------------------------------------------------|------------------|---------|---------|---------|--------|---------|--|
| <i>m</i>          |                                                       | C(84.5), D(72.1) | A(86.5) | E(90.5) | B(89.8) | H(5.1) | G(56.1) |  |
| $V_i^{\max}$      |                                                       | 110              | 110     | 110     | 110     | 110    | 110     |  |
| $U_i^{\max}$      |                                                       | -                | 80      | -       | -       | -      | 80      |  |
| $K_{m,i}$         |                                                       | 708              | 708     | 708     | 708     | 708    | 708     |  |
| $L_{m,i}$         |                                                       | -                | 13261   | -       | -       | -      | 13393   |  |
| $T_{1/2,i}^{fun}$ |                                                       | -                | 1.75    | -       | -       | -      | 1.5     |  |
| $L_i$ transcr.    |                                                       | 6623             | 2147    | 0       | 2406    | 1538   | 6215    |  |
| $L_i$ transl.     |                                                       | 0                | 657     | 0       | 0       | 0      | 3075    |  |
| $c_p$             |                                                       | -                | 20      | -       | -       | -      | 20      |  |
| $c_i$             |                                                       | 85               | 85      | 85      | 85      | 85     | 85      |  |

| Gene class        | <b><math>\Delta 6 = \Delta EBHGzADc = TA516</math></b> | <i>rrn</i> | Load 1  | Load 2  | Load 3  | Load 4 | Load 5  | Load 6  |  |
|-------------------|--------------------------------------------------------|------------|---------|---------|---------|--------|---------|---------|--|
| <i>m</i>          |                                                        | C(84.5)    | A(86.5) | E(90.5) | B(89.8) | H(5.1) | G(56.1) | D(72.1) |  |
| $V_i^{\max}$      |                                                        | 110        | 110     | 110     | 110     | 110    | 110     | 110     |  |
| $U_i^{\max}$      |                                                        | -          | -       | -       | -       | -      | 80      | 80      |  |
| $K_{m,i}$         |                                                        | 708        | 708     | 708     | 708     | 708    | 708     | 708     |  |
| $L_{m,i}$         |                                                        | -          | -       | -       | -       | -      | 13393   | 13261   |  |
| $T_{1/2,i}^{fun}$ |                                                        | -          | -       | -       | -       | -      | 1.5     | 1.75    |  |
| $L_i$ transcr.    |                                                        | 6623       | 1503    | 0       | 2406    | 1538   | 6215    | 2147    |  |
| $L_i$ transl.     |                                                        | 0          | 0       | 0       | 0       | 0      | 3075    | 657     |  |
| $c_p$             |                                                        | -          | -       | -       | -       | -      | 20      | 20      |  |
| $c_i$             |                                                        | 85         | 85      | 85      | 85      | 85     | 85      | 85      |  |
