# Supplementary material for: A Coarse-Grained Biophysical Model of E. coli and Its Application to Perturbation of the rRNA Operon Copy Number
Source: PLOS journal article supplement (doi:10.1371/journal.pcbi.1000038), 2008-05-01
Supplement: S6 (10.1371/journal.pcbi.1000038.s006) [file journal.pcbi.1000038.s006]

301 Moved Permanently

# Moved Permanently

The document has moved here.

---

Apache Server at www.ploscompbiol.org Port 80
