# Supplementary material for: A Coarse-Grained Biophysical Model of E. coli and Its Application to Perturbation of the rRNA Operon Copy Number
Source: PLoS Comput Biol. 2008 May 2;4(5):e1000038. doi: 10.1371/journal.pcbi.1000038 (PMC2320978; doi:10.1371/journal.pcbi.1000038)
Supplement: Table S1 — Genetic parameters for E. coli growing at 1 and 2.5 doub/h, 37°C. (0.13 MB PDF) [file pcbi.1000038.s002.pdf]

**Table S1. Genetic parameters for *E. coli* growing at 1 and 2.5 doub/h, 37°C.** Values not in parentheses are for 2.5 doub/h. Values in parentheses are for 1 doub/h, with the rest of the values being identical to those at 2.5 doub/h. Note that all concentrations have been multiplied by the average cell volume  $V_{cell}(\mu_0)$  of a WT cell growing in the given medium, i.e.  $\mu_0=2.5$  doub/h (and 1 doub/h). Cell volumes are given in Table S2. Using these units for  $K_{m,i}$ ,  $L_{m,i}$  and  $d_i$  when solving the equations of state for a genetically perturbed cell generates concentrations (e.g.  $n_{RNAP,free}$ ,  $n_{ribo,free}$  etc.) also in these units, i.e. concentration times  $V_{cell}(\mu_0)$ . Values in bold are estimates (see respective footnotes and main text).

| Gene class                  |                                           | Units      | r-protein <sup>a</sup> | bulk <sup>b</sup>                    | <i>rrn</i> <sup>c</sup>                               |
|-----------------------------|-------------------------------------------|------------|------------------------|--------------------------------------|-------------------------------------------------------|
| $m^d$                       | Map location                              | MU (min)   | see footnote d         | 66 (417) uniformly distributed genes | C 84.5; D 72.1; G 56.1; H 5.1; B 89.8; E 90.5; A 86.5 |
| $V_i^{\max \text{ e}}$      | Maximum transcription initiation rate     | ini/min    | 33                     | 3.04 (1.71)                          | 110                                                   |
| $U_i^{\max \text{ f}}$      | Maximum translation initiation rate       | ini/min    | -                      | <b>80</b>                            | -                                                     |
| $K_{m,i}^g$                 | Promoter-RNAP holoenzyme binding affinity | molec/cell | 501 (264)              | 501 (264)                            | 797 (1440)                                            |
| $L_{m,i}^h$                 | RBS-30S ribosome subunit binding affinity | molec/cell | -                      | <b>6144 (3226)</b>                   | -                                                     |
| $T_{1/2,i}^{fun \text{ i}}$ | mRNA half-life                            | min        | -                      | <b>6.8 (1.28)</b>                    | -                                                     |
| $L_i^j$                     | Gene class length                         | base pairs | 21252                  | 1000                                 | 6623                                                  |
| $c_p^k$                     | Peptide chain elongation rate             | aa/sec     | 21 (16)                | 21 (16)                              | -                                                     |
| $c_i^l$                     | RNA chain elongation rate                 | nuc/sec    | 55 (45)                | 1.37 (4.09)                          | 85                                                    |

<sup>a</sup> This class is analogous to the constitutive gene class of [28], where we consolidated all r-protein genes into a single operon (c.f. footnote d). Note that r-protein is assumed to be constitutive as transcription of most r-protein operons is not growth rate regulated [1].

<sup>b</sup> Bulk gene class gene dosage  $D_{bulk}$ , maximum transcription initiation rate,  $V_{bulk}^{\max}$ , and transcription elongation rate,  $c_{bulk}$ , are a consolidation of repressable (r) and pause (ps) promoter classes of [28] such that the bulk gene class is mathematically equivalent to the sum of these two promoter classes in terms of transcription and translation (see below).

<sup>c</sup> *rrn* gene class is a consolidation of P1 and P2 *rrn* promoter classes in [28].

<sup>d</sup> To convert from MU (min) ( $0 < MU < 100$  min) to units relative to oriC ( $0 < m < 1$ ) see table 5 in [17]. *rrn* map locations were taken from [54]. Bulk protein genes are assumed to be uniformly distributed across the chromosome:  $m = (0, 1, \dots, N_{bulk}-1)/N_{bulk}$ . The number of bulk genes,  $N_{bulk}$ , was ascertained using Eq. S7 for the gene dosage:  $D_{bulk}(\mu) = \sum_{i=0}^{N_{bulk}-1} 2^{\mu(C(1-m_i)+D)} = 2^{\mu(C+D)} (1 - 2^{-\mu C/N_{bulk}})$ ,  $m_i = i/N_{bulk}$ , and

solving for  $N_{bulk}$ , where  $D_{bulk} = D_r + D_{ps}$  and  $D_r$  and  $D_{ps}$  are the gene dosage of repressable and pause promoter classes respectively, taken from tables 1 and 2 of [28]:  $D_{bulk}(2.5 \text{ doub/h}) = 251$  and  $D_{bulk}(1 \text{ doub/h}) = 771$ . Gene concentrations  $d_i(\mu)$  in Eq. 2 can be calculated using Eq. 3:  $d_i(\mu) = \frac{1}{\ln 2 V_{ini}} \sum_j 2^{-m_j^{(i)} C \mu}$ , where  $(V_{ini} \ln 2)^{-1} = V_{cell}^{-1}(\mu_0) 2^{\mu_0(C+D)}$  (see Eq. S8) is evaluated for a high enough  $\mu_0$ . For

example, for  $\mu_0 = 2.5 \text{ doub/h}$ ,  $(V_{ini} \ln 2)^{-1} = 5.45(\mu\text{m})^{-3}$  (see Table S2 for WT cell volumes). In practice, for genetic perturbation simulations it is convenient to use concentration in units of concentration:  $V_{cell}(\mu_0)$ , where  $\mu_0$  is chosen to be the growth rate of a WT cell in the given environment. Thus  $d_i(\mu) V_{cell}(\mu_0) = 2^{\mu_0(C+D)} \sum_j 2^{-m_j^{(i)} C \mu}$ . The factor  $2^{\mu_0(C+D)}$  is 6.54 for 2.5 doub/h and 2.43 for 1 doub/h ( $C$

and  $D$  are given in Table S2). The only exception to this rule is in the calculation of gene concentration for the r-protein gene class. Since the 19 operons of r-protein were concatenated on a *single* operon, in order to capture a more realistic growth rate dependence of the gene concentration, the following formula was used:  $d_{r-protein}(\mu) = d_{r-protein}(\mu_0) \sum_{j=1}^{19} 2^{-m_j^{(r-protein)} C \mu} / \sum_{j=1}^{19} 2^{-m_j^{(r-protein)} C \mu_0}$  where  $d_{r-protein}(\mu_0) = d_{rrn}(\mu_0)/7$ ,

$\mu_0$  = growth rate of WT cell in the given medium,  $d_{rrn}(\mu_0) = D_{rrn}(\mu_0)/V_{cell}(\mu_0)$  and  $D_{rrn}(\mu_0) = \sum_{j=1}^7 2^{\mu(C(1-m^{(rrn)})+D)}$ . For example,  $D_{rrn}(\mu_0 = 2.5$

doub/h) = 36.0 and  $D_{rrn}(\mu_0 = 1.0 \text{ doub/h}) = 15.1$  (also c.f. table 2 of [28] and table 3 of [17]);  $D_{r-protein}(\mu_0 = 2.5 \text{ doub/h}) = 5.14$  and  $D_{r-protein}(\mu_0 = 1.0 \text{ doub/h}) = 2.16$ ; r-protein map locations are: 74.27, 74.38, 74.15, 74.84, 90.02, 90.05, 71.33, 38.75, 0.45, 20.72, 59.14, 4.09, 95.33, 69.16, 72.77, 49.15, 82.11, 24.71, 83.68 min [1].

<sup>e</sup> Maximum transcription initiation rates for the r-protein and *rrn* gene classes are given by the constitutive and *rrn* promoter classes respectively in tables 1 and 2 of [28]. The maximum transcription initiation rate for the bulk gene class is given by

$V_{bulk}^{max} = (D_r V_r^{max} + D_{ps} V_{ps}^{max}) / D_{bulk}$  where  $V_r^{max}$  and  $V_{ps}^{max}$  are the maximum transcription initiation rates of repressable and pause promoter classes respectively, taken from tables 1 and 2 of [28] and  $D_{bulk}$  is defined in footnote d.

<sup>f</sup> The maximum translation initiation rate for the bulk gene class,  $U_{bulk}^{max}$ , was chosen to be an arbitrarily value above observed translation initiation rates and below the maximum physical limit set by close packing of ribosomes. See also S1.1.1 and main text.

<sup>g</sup> RNAP holoenzyme-promoter binding affinity for r-protein and for bulk gene classes are given by the constitutive and repressable/pause binding affinities given in tables 1 and 2 of [28]. The binding affinity for the *rrn* gene class,  $K_{m,rrn}$ , was calculated based on  $i_{rrn} = V_{rrn}^{max} n_{RNAP,free} / (n_{RNAP,free} + K_{m,rrn})$ , where  $n_{RNAP,free}$  is the free RNAP concentration and  $i_{rrn}$  is the observed number of initiations per *rrn* operon, given in table 3 of [28].  $K_m$  values are given in units of concentration times the volume of a WT cell in the given medium. To convert to  $\mu M$ :  $K_m(\mu M) = K_m(\text{molec per cell}) / V_{cell}(\mu m^3) / 602$ .  $V_{cell}$  is given in Table S2. Note that for constitutive promoters:  $K_m(1 \text{ doub/h; molec/cell}) = K_m(2.5 \text{ doub/h; molec/cell}) V_{cell}(1 \text{ doub/h}) / V_{cell}(2.5 \text{ doub/h})$ .

<sup>h</sup> Ribosome binding affinities were calculated as described in the main text and S1.1.1. To convert to  $\mu M$  use formula given in footnote g. It was assumed that bulk mRNA expression parameters,  $U_{bulk}^{max}$  and  $L_{m,bulk}$ , are fixed and growth rate independent and were based on estimation at 2.5 doub/h (c.f. S1.1.1). Therefore  $L_m(1 \text{ doub/h; molec/cell}) = L_m(2.5 \text{ doub/h; molec/cell}) V_{cell}(1 \text{ doub/h}) / V_{cell}(2.5 \text{ doub/h})$ .

<sup>i</sup> Since mRNA half-life can alter due to translation-degradation coupling (see main text and S2.7), the actual genetic parameter is not  $T_{1/2,i}^{fun}$ , but rather the mRNA half-life in the absence of ribosomes,  $T_{1/2,i}^{fun,0}$ .  $T_{1/2,i}^{fun,0}$  is a combination of the Michaelis-Menten parameters of mRNA degradation ( $W_i^{max}$ ,  $J_{m,i}$ ) and the mRNA binding affinity of RNase E to its own mRNA,  $J_i$  (c.f. S2.5.2 and S2.7). For mRNA decay via the 5' competition model (Eq. R3 in S2.5.2) this parameter is given by  $T_{1/2,i}^{fun,0} = [J_{m,i} / (J_i W_i^{max})] \ln 2$  and according to this

model it can be calculated from  $T_{1/2,i}^{fun,0} = T_{1/2,i}^{fun}(WT) (1 + n_{ribo,free}(WT) / L_{m,i})^{-1}$ , where  $n_{ribo,free}(WT)$  is the WT concentration of free ribosomes and  $T_{1/2,i}^{fun}(WT)$  is the WT mRNA half-life of the *i*-th gene class (see S2.5.2, S2.6, S2.7 and main text for further details).

Determination of  $T_{1/2,i}^{fun}$ : total intensity of all mRNA in *E. coli* MG1655 in LB broth at 37°C was measured to decay exponentially with a half-life of 6.8 min [40] (the exact growth rate of the culture was not given). This value was taken as the bulk mRNA half-life. This approximation is valid if r-protein half-life is close to the total mRNA half-life. To check this, using data published online (mRNA\_half\_lives.txt, [40] online), the average mRNA intensity weighed half-life of all genes was 8.6 min (where intensity was approximated by the average difference at t=0, 2-fold method; setting, as the authors, HL>40min to 40min [40]). The average intensity weighted half-life of all r-protein genes was 8.2 min, close to the average mRNA half-life of all genes. For 1 doub/h,  $U_{bulk}^{max}$  and  $L_{m,bulk}$  were assumed to be fixed at their value at 2.5 doub/h, and  $T_{1/2,i}^{fun}$  was estimated to minimize the error with respect to the wild-type cell state at 1 doub/h (see S1.1.1).

<sup>j</sup> For the r-protein gene class,  $L_{r-protein}$  is taken to be the sum of all r-proteins gene lengths for MG1655. Genes are listed in [71] pp. 60-61. L7 is discarded since it is identical to L12 (only N-acetylated). L26 is discarded since it is identical to S20 and appears only once in the 70S ribosome [71] p. 61. Note that the number of amino acids in a 70S ribosome is slightly higher (=22332/3) since L7/L12 appears in four copies in the final ribosome [71] p. 61. Bulk gene class length is based on tables 1 and 2 of [28] (for comparison, according to [102] the average is 1100 bp). *rrn* gene length is calculated as follows: There are 4566 bp of rRNA in a 70S ribosome (table 1 in [17]); precursor rRNA length is 6000bp (table 1 in [17]); The length of the *rrn* gene class includes transfer RNA (tRNA) coding genes since rRNA and tRNA are stoichiometrically fixed at a ratio of 14:86 at all growth rates (table 1 of [17]; [3]). Although this fixed proportionally appears to be disrupted in perturbed cells [19], we currently do not take this correction into account. Since this gene class includes tRNA transcription and any overhead in the precursor rRNA, the total gene class length is: (total rRNA + total tRNA) + (precursor overhead) = 4566/0.86 + (6000 - 120 - 4566) = 6623bp where 120bp is the average tRNA gene length inside *rrn* operons (which is subtracted because it is already included in the 14% tRNA).

<sup>k</sup> See table 3 in [17]. By redefining  $c_p$  for the *i*-th gene class as:  $c_{p,i} = c_p / (1 + c_p / (L_i U_i^{max}))$  one can take into account ribosomes bound to the RBS of the *i*-th gene class mRNA, which was neglected in Eq. 2v. For  $U_i^{max} = 80$  ini/min, for example, this correction is quite small (21→20 aa/sec and 16→15.4 aa/sec) but it may be consequential for low values of  $U_i^{max}$ . This correction was included in the simulations for the bulk protein gene class.

<sup>l</sup> r-protein mRNA chain elongation rate and rRNA chain elongation rate are given by the constitutive promoter class mRNA elongation rate and *rrn* promoter class rRNA chain elongation rate respectively in tables 1 and 2 in [28]. Bulk gene class mRNA chain elongation rate is given by  $c_{bulk} = D_{bulk} V_{bulk}^{max} (D_r V_r^{max} / c_r + D_{ps} V_{ps}^{max} / c_{ps})^{-1}$  where  $D_{bulk}$  is defined in footnote d and  $V_{bulk}^{max}$ ,  $V_r^{max}$  and  $V_{ps}^{max}$  are defined in footnote e and  $c_r$  and  $c_{ps}$  are the transcription elongation rate for repressable and pause genes respectively defined in tables 1 and 2 of [28]. By redefining  $c_i$  to be  $c'_i = c_i / (1 + c_i / (L_i V_i^{max}))$  one can take into account RNAP bound to promoters, which was neglected in Eq. 2iv. This correction is substantial for repressable genes due to their low  $V_i^{max}$ . In the simulations this correction was implemented for the pause and repressable gene classes ( $c_r$  and  $c_{ps}$ ). By correcting  $c_r$  and  $c_{ps}$  one obtains  $c_{bulk} = 1.36$  (3.58) nuc/sec for 2.5 (1.0) doub/h. We note that mRNA chain elongation rate in table 2 of [28] should be 55 nuc/sec and not 45 nuc/sec, due to a misprint.
