# Supplementary material for: A Coarse-Grained Biophysical Model of E. coli and Its Application to Perturbation of the rRNA Operon Copy Number
Source: PLoS Comput Biol. 2008 May 2;4(5):e1000038. doi: 10.1371/journal.pcbi.1000038 (PMC2320978; doi:10.1371/journal.pcbi.1000038)
Supplement: Table S3 — Reconstruction of the WT cell state for 1 and 2.5 doub/h, 37°C. (0.09 MB PDF) [file pcbi.1000038.s004.pdf]

**Table S3. Reconstruction of the WT cell state for 1 and 2.5 doub/h, 37°C.** Variables denoted in bold were allowed to vary in order to minimize the MSE with respect to the WT cell state. The error in cell state was not greater than 6%. All concentrations are given in molec/cell, where  $V_{cell}$  is 1.2 and 0.63 ( $\mu\text{m}$ )<sup>3</sup> at 2.5 and 1 doub/h respectively (Table S2).  $n_0=2.77$  mM. The nonlinear least squares problem was solved using the Levenberg-Marquardt method implemented in Matlab 7. See main text and S1.1.1 in Text S1 for further explanations.

| $U_{bulk}^{\max}$<br>(ini/min) | $L_{m,bulk}$<br>( $\cdot 10^2$ )           | $C_{ribo}$ | $T_{1/2,bulk}^{fun}$<br>(min) | $U_{bulk}$<br>(ini/min) | $\mu$<br>doub/h | $n_{bulk}$<br>( $\cdot 10^6$ ) | $n_{ribo}$<br>( $\cdot 10^4$ ) | $n_{RNAP}$<br>( $\cdot 10^3$ ) | $n_{RNAP,free}$ | $n_{ribo,free}$<br>( $\cdot 10^3$ ) |
|--------------------------------|--------------------------------------------|------------|-------------------------------|-------------------------|-----------------|--------------------------------|--------------------------------|--------------------------------|-----------------|-------------------------------------|
| 40                             | <b>9.57 (1.3 <math>\mu\text{M}</math>)</b> | <b>49</b>  | 6.8                           | 33                      | 2.5             | <b>5.60</b>                    | <b>7.33</b>                    | 11.4                           | <b>916</b>      | <b>4.72</b>                         |
| 80                             | <b>61.4 (8.5 <math>\mu\text{M}</math>)</b> | <b>53</b>  | 6.8                           | 35                      | 2.5             | <b>5.85</b>                    | <b>7.33</b>                    | 114                            | <b>916</b>      | <b>4.72</b>                         |
| 40                             | 5.03 (1.3 $\mu\text{M}$ )                  | <b>85</b>  | <b>1.2</b>                    | 32                      | 1               | <b>2.15</b>                    | <b>1.30</b>                    | 2.8                            | <b>143</b>      | <b>1.94</b>                         |
| 80                             | 32.3 (8.5 $\mu\text{M}$ )                  | <b>90</b>  | <b>1.3</b>                    | 30                      | 1               | <b>2.23</b>                    | <b>1.30</b>                    | 2.8                            | <b>143</b>      | <b>1.94</b>                         |
