# Supplementary material for: A Coarse-Grained Biophysical Model of E. coli and Its Application to Perturbation of the rRNA Operon Copy Number
Source: PLoS Comput Biol. 2008 May 2;4(5):e1000038. doi: 10.1371/journal.pcbi.1000038 (PMC2320978; doi:10.1371/journal.pcbi.1000038)
Supplement: Table S6 — Lineage of the rrn inactivation strains. (0.09 MB PDF) [file pcbi.1000038.s007.pdf]

**Table S6. Lineage of the *rrn* inactivation strains.** The following table traces the lineage of all *rrn* inactivation strains and indicates the length of each inactivated *rrn* operon that was transcribed, and in cases where the inactivated operon expressed a protein (*cat* or *lacZ* insertions), the length of the translated portion is also specified. A  $\Delta n$  strain indicates that  $n$  operons were inactivated. See S1.3 in Text S1 for further details.

|                                                                                                                                                                     |                                                         |
|---------------------------------------------------------------------------------------------------------------------------------------------------------------------|---------------------------------------------------------|
| $\Delta 0 = rrn^+ = TA563$                                                                                                                                          | source: $\Delta TX11$ from [106]                        |
| $\Delta 1 = \Delta Ac = TA566$                                                                                                                                      |                                                         |
| <b>A transcription: 2147bp</b> (with $P_1P_2$ -CAT fusion) <sup>1</sup> . <b>translation: <math>cat^+</math>: 657bp</b>                                             | source : $P_1P_2$ -CAT fusion BAG1 in [54] <sup>2</sup> |
| $\Delta 2 = \Delta EAc = TA567$                                                                                                                                     |                                                         |
| <b>E</b> Completely deleted                                                                                                                                         | source $TX\Delta 11$ [106]. See also fig. 1 in [91]     |
| <b>A transcription: 2147bp</b> (with $P_1P_2$ -CAT fusion; see remarks in $\Delta 1$ ). <b>translation: <math>cat^+</math>: 657bp</b>                               | source : $P_1P_2$ -CAT fusion BAG1 in [54]              |
| $\Delta 3 = \Delta EBAC = TA568$                                                                                                                                    |                                                         |
| <b>E</b> Completely deleted                                                                                                                                         | source $TX\Delta 11$ [106]. See also fig. 1 in [91]     |
| <b>B transcription: 2287(PCR:16S-23S)+119(5S)<sup>3</sup>=2406 bp</b> <sup>4</sup>                                                                                  | source: pMA101, SalI-SalI deletion [7]                  |
| <b>A transcription: 2147bp</b> (with $P_1P_2$ -CAT fusion; see remarks in $\Delta 1$ ). <b>translation: <math>cat^+</math>: 657bp</b>                               | source : $P_1P_2$ -CAT fusion BAG1 in [54]              |
| $\Delta 4 = \Delta EBHAc = TA430$                                                                                                                                   |                                                         |
| <b>E</b> Completely deleted                                                                                                                                         | source $TX\Delta 11$ [106]. See also fig. 1 in [91]     |
| <b>B transcription: 2287(PCR:16S-23S)+119(5S)=2406 bp</b> (see remarks in $\Delta 3$ )                                                                              | source: pMA101, SalI-SalI deletion [7]                  |
| <b>H transcription: 1290(PCR:16S-23S) + 248(5S+distal tRNA) = 1538 bp</b> <sup>5</sup>                                                                              | source: pMA103, SacII-SacII deletion [7]                |
| <b>A transcription: 2147bp</b> (with $P_1P_2$ -CAT fusion; see remarks in $\Delta 1$ ). <b>translation: <math>cat^+</math>: 657bp</b>                               | source : $P_1P_2$ -CAT fusion BAG1 in [54]              |
| $\Delta 5 = \Delta EBHGzAc = TA476$                                                                                                                                 |                                                         |
| <b>E</b> Completely deleted                                                                                                                                         | source $TX\Delta 11$ [106]. See also fig. 1 in [91]     |
| <b>B transcription: 2287(PCR:16S-23S)+119(5S)=2406 bp</b> (see remarks in $\Delta 3$ )                                                                              | source: pMA101, SalI-SalI deletion [7]                  |
| <b>H transcription: 1290(PCR:16S-23S) + 248(5S+distal tRNA) = 1538 bp</b> (see remark in $\Delta 4$ )                                                               | source: pMA103, SacII-SacII deletion [7]                |
| <b>G transcription: 2928(16S-23S) + 3075(<i>lacZ</i><sup>+</sup>)+212(5S) = 6215</b> <sup>6</sup> . <b>translation: <i>lacZ</i><sup>+</sup> 3075</b>                | source pNY30, smaI-HpaI deletion in [7]                 |
| <b>A transcription: 2147bp</b> (with $P_1P_2$ -CAT fusion; see remarks in $\Delta 1$ ). <b>translation: <math>cat^+</math>: 657bp</b>                               | source : $P_1P_2$ -CAT fusion BAG1 in [54]              |
| $\Delta 6 = \Delta EBHGzADc = TA516$                                                                                                                                |                                                         |
| <b>E</b> Completely deleted                                                                                                                                         | source $TX\Delta 11$ [106]. See also fig. 1 in [91]     |
| <b>B transcription: 2287(PCR:16S-23S)+119(5S)=2406 bp</b> (see remarks in $\Delta 3$ )                                                                              | source: pMA101, SalI-SalI deletion [7]                  |
| <b>H transcription: 1290(PCR:16S-23S) + 248(5S+distal tRNA) = 1538 bp</b> (see remark in $\Delta 4$ )                                                               | source: pMA103, SacII-SacII deletion [7]                |
| <b>G transcription: 2928 (16S-23S) + 3075(<i>lacZ</i><sup>+</sup>)+212(5S) = 6215</b> (see remark in $\Delta 5$ ). <b>translation: <i>lacZ</i><sup>+</sup> 3075</b> | source pNY30, smaI-HpaI deletion in [7]                 |
| <b>A transcription: 1290 (<i>rrnH</i> PCR:16S-23S) + 213(5S) = 1503bp</b> <sup>7</sup>                                                                              | source: pNY34, SacII-SacII deletion [7]                 |
| <b>D transcription: 2147bp</b> (with $P_1P_2$ -CAT fusion). <b>translation: <math>cat^+</math>: 657bp</b>                                                           | source: W1485 $\Delta$ D in [19] <sup>8</sup>           |

<sup>1</sup> Measured from figure 1 in [54].

<sup>2</sup> Linage is traced as follows:

(i) BAG1 from [54] is designated CC164 in [19] and the A was inserted into the final strain.

(ii) A originated from the A1 strain of [54].

(iii) A1 was taken from [7] where it was designated W1485 $\Delta$ A. W1485 $\Delta$ A was formed by cutting *rrnA* at the first smaI restriction enzyme site (see figure 1 in [19]) and attaching to it a promoterless CAT gene from plasmid pKK232-8 [107]. pKK232-8 was also cut at smaI ([7] p. 4184, [107] p. 157). This is the first smaI site (see figure 1 in [19]) since according to [54] the CAT was inserted at position 612 bp from the start of 16S. According to figure 1 of [19] the first smaI is located at 605 bp position (assuming WT 16S-23S is 4719 bp [19]). This confirms that the scaling for this figure is correct.

(iv) pKK232-8 was designed by [107] and they used a CAT cassette based on [108].

(v) In [108] it is explained that CAT are derivatives of the *Cm<sup>r</sup>* gene of the bacterial transposon Tn9 and contains the complete CAT polypeptide coding sequence. According to [108] this is 660 bp. This is confirmed in NCBI site for pKK232-8 (=657bp). Next we need to ascertain the length of the transcribed segment. The actual length of the CAT cassette in pKK232-8 is longer then 660 bp since (a) the coding region actually taken in [108] was 780bp and (b) pHH232-8 was cut at smaI which is upstream of the CAT cassette (figure 7 in [107]). Since the exact location of smaI was uncertain, the length of the transcribed gene was estimated from figure 1 in [54].

<sup>3</sup> Measured from end of 23S

<sup>4</sup> PCR length from [19] + 5S length taken from the NCBI site.

<sup>5</sup> PCR length from [19] + 5S+tRNA length taken from the NCBI site.

<sup>6</sup> Assuming a length of 4876 bp for the 16S-23S segment of *rrnG* (NCBI site) and from scaling of figure 1 in [19]. The first smaI was chosen, as described in figure 1 of [91]. *LacZ* length is from EcoCyc site, 5S length is from the NCBI site.

<sup>7</sup> Assumed to be like *rrnH* PCR fragment since the 16S-23S sequence length of *rrnA* and *rrnH* are both 4892 bp and the same restriction enzymes were used; 5S length was taken from the NCBI site.

<sup>8</sup> W1485 $\Delta$ D in [19] was obtained by the same procedure as W1485 $\Delta$ A described above: a promoterless CAT gene was inserted into the first smaI site at 612 bp; (see  $\Delta 1$ ).
